# Supplementary material
Source: MDPI journal article supplement (https://www.mdpi.com/2673-4583/5/1/9)
Supplement: s1 [file s1]

# Colorimetric Determination of Nitrate after Reduction to Nitrite in a Paper-Based Dip Strip <sup>†</sup>

Amer Charbaji \*, Hojat Heidari-Bafroui, Nasim Rahmani, Constantine Anagnostopoulos and Mohammad Faghri \*

Microfluidics Laboratory, Department of Mechanical, Industrial and Systems Engineering, University of Rhode Island, 2 East Alumni Avenue, Kingston, RI 02881, USA; h\_heidari@uri.edu (H.H.-B.); nara7@uri.edu (N.R.); anagnostopoulos@uri.edu (C.A.)

\* Correspondence: charbaji@uri.edu (A.C.); faghri@uri.edu (M.F.)

<sup>†</sup> Presented at the 1st International Electronic Conference on Chemical Sensors and Analytical Chemistry (CSAC2021).

Figure S1 shows a dip strip used in our experiments.

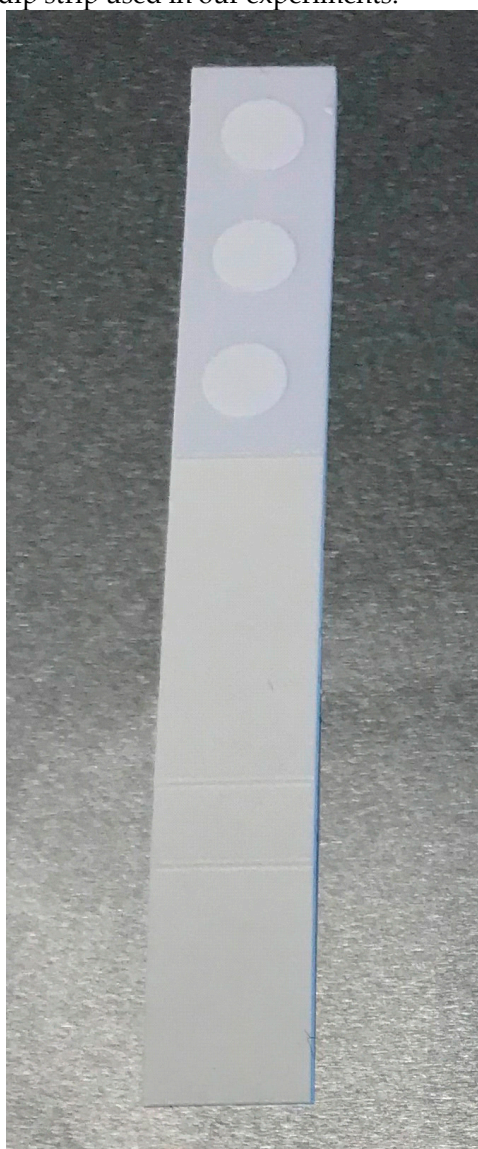

**Citation:** Charbaji, A.; Heidari-Bafroui, H.; Rahmani, N.; Anagnostopoulos, C.; Faghri, M. Colorimetric Determination of Nitrate After Reduction to Nitrite in a Paper-Based Dip Strip. *Chem. Proc.* **2021**, *5*, 9. <https://doi.org/10.3390/CSAC2021-10459>

Academic Editor: Manel del Valle

Published: 30 June 2021

**Publisher's Note:** MDPI stays neutral with regard to jurisdictional claims in published maps and institutional affiliations.

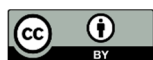

**Copyright:** © 2021 by the authors. Licensee MDPI, Basel, Switzerland. This article is an open access article distributed under the terms and conditions of the Creative Commons Attribution (CC BY) license (<https://creativecommons.org/licenses/by/4.0/>).

**Figure S1.** Dip strip used in experiments.

Figure S2 shows the dip strips after the solutions are dried on the detection zones. Solutions “A” and “B” are prepared following the procedure outlined by Thongkam et al. [1].

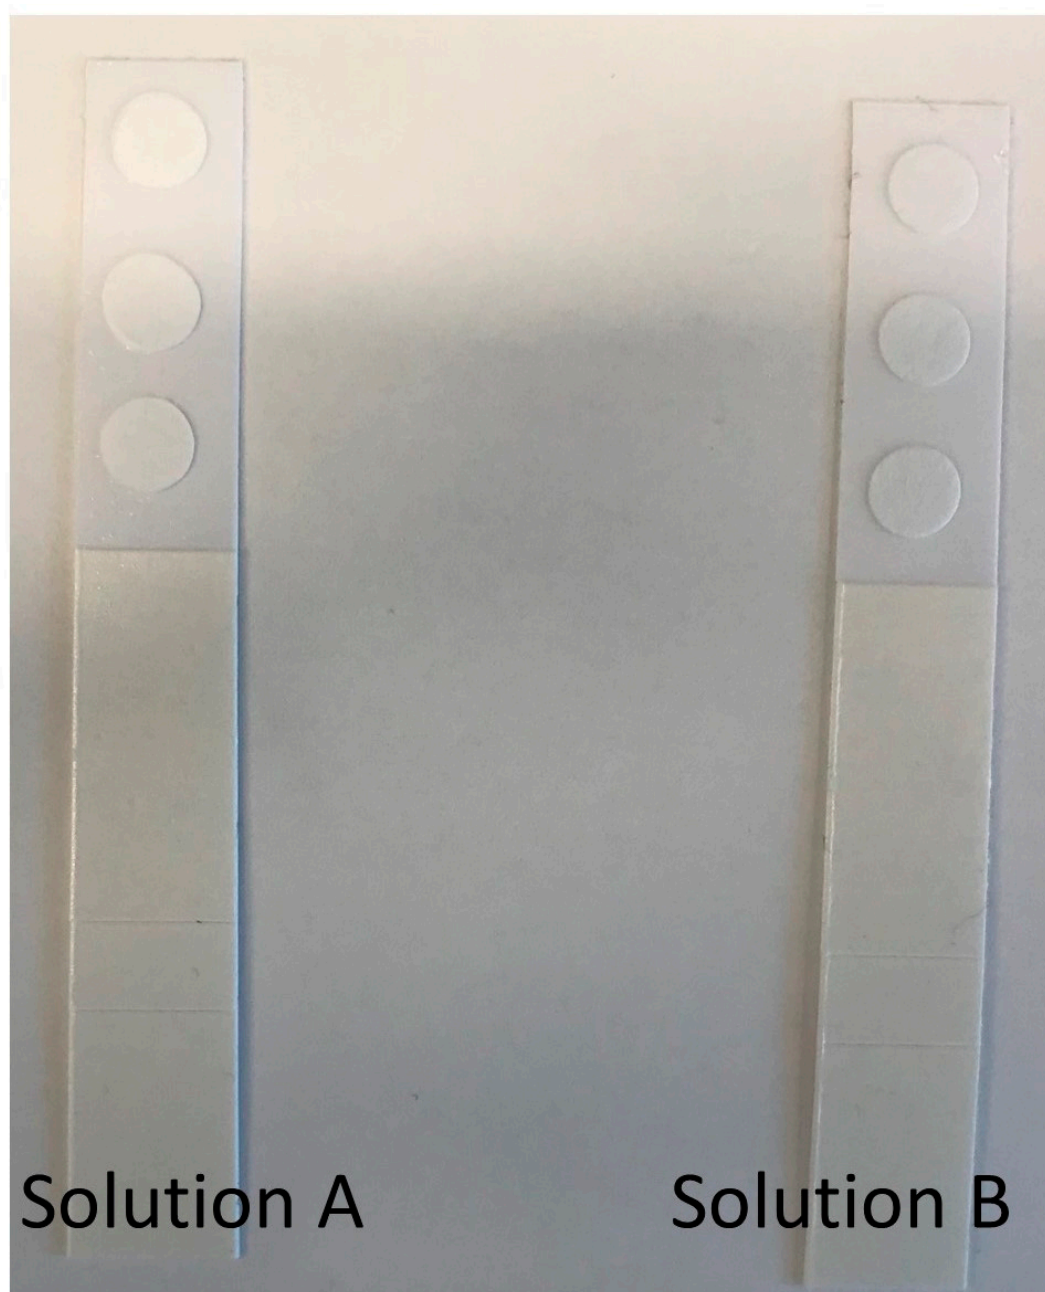

**Figure S2.** Dip strip used in experiments after the solutions are dried on the detection zones.

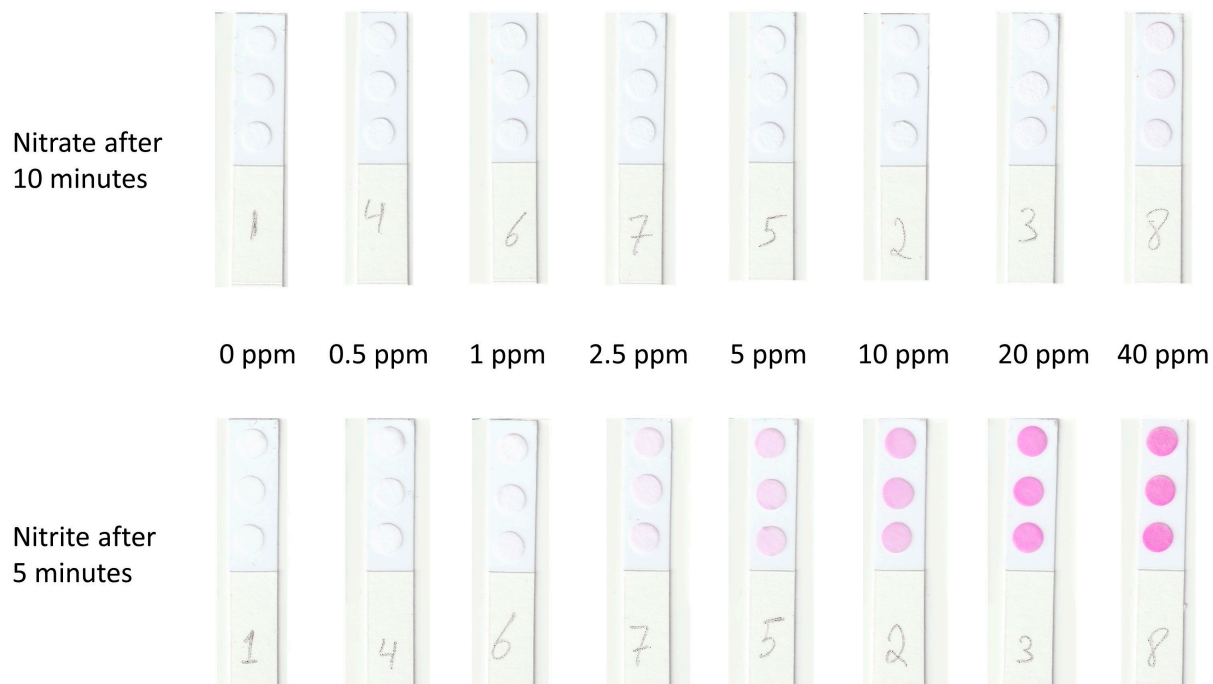

**Figure S3.** Color formed in the detection zone vs. nitrate or nitrite concentrations after several minutes.

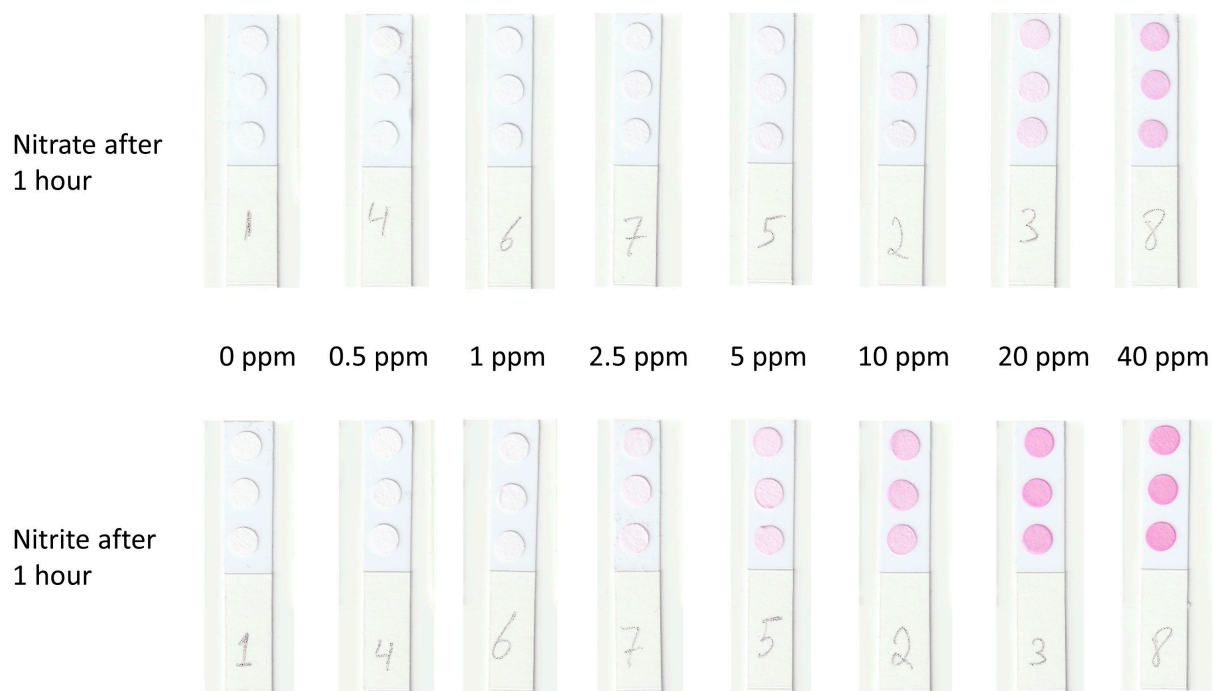

**Figure S4.** Color formed in the detection zone vs. nitrate or nitrite concentrations after 1 hour

**Table S1.** ImageJ analysis of nitrate detection zones after 10 minutes. Test order was randomized.

| Standard | Nitrate Concentration (ppm) | Run Order | Unweighted Intensity Value (a.u.) | Weighted Intensity Value (a.u.) | RGB Intensity Value (a.u.) | Red Intensity Value (a.u.) | Green Intensity Value (a.u.) | Blue Intensity Value (a.u.) |
|----------|-----------------------------|-----------|-----------------------------------|---------------------------------|----------------------------|----------------------------|------------------------------|-----------------------------|
| 1        | 0                           | 1         | 251.065                           | 250.971                         | 250                        | 247.881                    | 252.005                      | 253.42                      |
| 2        | 0                           | 1         | 250.3                             | 250.078                         | 249.075                    | 246.752                    | 251.142                      | 253.048                     |
| 3        | 0                           | 1         | 249.826                           | 249.729                         | 248.423                    | 245.995                    | 251.015                      | 252.622                     |
| 4        | 0.5                         | 4         | 250.304                           | 250.113                         | 248.996                    | 247.024                    | 251.116                      | 252.811                     |
| 5        | 0.5                         | 4         | 250.768                           | 250.663                         | 249.449                    | 247.326                    | 251.816                      | 253.267                     |
| 6        | 0.5                         | 4         | 249.793                           | 249.693                         | 248.323                    | 246.101                    | 250.948                      | 252.464                     |
| 7        | 1                           | 6         | 250.82                            | 250.806                         | 249.156                    | 248.226                    | 251.697                      | 252.702                     |
| 8        | 1                           | 6         | 250.534                           | 250.469                         | 249.381                    | 247.83                     | 251.358                      | 252.553                     |
| 9        | 1                           | 6         | 249.875                           | 249.682                         | 248.274                    | 246.758                    | 250.636                      | 252.298                     |
| 10       | 2.5                         | 7         | 250.956                           | 250.839                         | 249.492                    | 248.2                      | 251.688                      | 253.09                      |
| 11       | 2.5                         | 7         | 250.103                           | 249.868                         | 249.003                    | 246.913                    | 250.825                      | 252.594                     |
| 12       | 2.5                         | 7         | 249.781                           | 249.456                         | 248.357                    | 246.777                    | 250.249                      | 252.33                      |
| 13       | 5                           | 5         | 251.465                           | 251.335                         | 250.03                     | 249.109                    | 252.03                       | 253.442                     |
| 14       | 5                           | 5         | 250.478                           | 250.259                         | 249.098                    | 247.619                    | 251.08                       | 252.805                     |
| 15       | 5                           | 5         | 249.514                           | 249.166                         | 247.936                    | 246.408                    | 249.998                      | 252.082                     |
| 16       | 10                          | 2         | 250.71                            | 250.4                           | 249.574                    | 248.004                    | 251.087                      | 253.071                     |
| 17       | 10                          | 2         | 250.191                           | 249.802                         | 248.598                    | 247.099                    | 250.592                      | 252.805                     |
| 18       | 10                          | 2         | 249.397                           | 249.066                         | 248.045                    | 246.134                    | 249.974                      | 252.016                     |
| 19       | 20                          | 3         | 251.108                           | 250.714                         | 249.908                    | 249.185                    | 251.02                       | 253.28                      |
| 20       | 20                          | 3         | 249.749                           | 249.249                         | 248.456                    | 247.59                     | 249.575                      | 252.159                     |
| 21       | 20                          | 3         | 249.372                           | 248.773                         | 248.188                    | 247.035                    | 249.093                      | 252.012                     |
| 22       | 40                          | 8         | 247.819                           | 246.824                         | 246.109                    | 246.922                    | 246                          | 250.803                     |
| 23       | 40                          | 8         | 247.738                           | 246.659                         | 246.487                    | 246.627                    | 245.811                      | 251.176                     |
| 24       | 40                          | 8         | 246.629                           | 245.46                          | 245.661                    | 245.274                    | 244.634                      | 250.453                     |

**Table S2.** ImageJ analysis of nitrate detection zones after 1 hour. Test order was randomized.

| Standard | Nitrate Concentration (ppm) | Run Order | Unweighted Intensity Value (a.u.) | Weighted Intensity Value (a.u.) | RGB Intensity Value (a.u.) | Red Intensity Value (a.u.) | Green Intensity Value (a.u.) | Blue Intensity Value (a.u.) |
|----------|-----------------------------|-----------|-----------------------------------|---------------------------------|----------------------------|----------------------------|------------------------------|-----------------------------|
| 1        | 0                           | 1         | 250.708                           | 250.871                         | 249.273                    | 248.809                    | 251.696                      | 251.837                     |
| 2        | 0                           | 1         | 251.095                           | 251.222                         | 249.545                    | 249.177                    | 252.009                      | 252.341                     |
| 3        | 0                           | 1         | 250.669                           | 251.05                          | 248.913                    | 248.353                    | 252.192                      | 251.781                     |
| 4        | 0.5                         | 4         | 249.77                            | 250.163                         | 247.717                    | 248.449                    | 251.024                      | 250.11                      |
| 5        | 0.5                         | 4         | 251.419                           | 251.592                         | 249.831                    | 249.609                    | 252.385                      | 252.494                     |
| 6        | 0.5                         | 4         | 251.026                           | 251.232                         | 249.387                    | 249.104                    | 252.11                       | 252.075                     |
| 7        | 1                           | 6         | 251.13                            | 251.163                         | 249.643                    | 249.383                    | 251.796                      | 252.458                     |
| 8        | 1                           | 6         | 250.696                           | 250.796                         | 249.562                    | 248.94                     | 251.518                      | 251.857                     |
| 9        | 1                           | 6         | 250.147                           | 250.235                         | 248.482                    | 248.329                    | 250.954                      | 251.392                     |
| 10       | 2.5                         | 7         | 250.441                           | 250.207                         | 248.822                    | 249.208                    | 250.414                      | 251.915                     |
| 11       | 2.5                         | 7         | 249.429                           | 248.967                         | 248.173                    | 248.297                    | 248.926                      | 251.159                     |
| 12       | 2.5                         | 7         | 249.72                            | 249.53                          | 248.227                    | 248.385                    | 249.817                      | 251.141                     |
| 13       | 5                           | 5         | 250.291                           | 249.589                         | 248.821                    | 249.437                    | 249.246                      | 252.091                     |
| 14       | 5                           | 5         | 249.306                           | 248.575                         | 247.909                    | 248.395                    | 248.166                      | 251.39                      |
| 15       | 5                           | 5         | 248.256                           | 247.477                         | 246.676                    | 247.455                    | 246.979                      | 250.296                     |
| 16       | 10                          | 2         | 247.854                           | 246.366                         | 246.621                    | 248.435                    | 244.532                      | 250.735                     |
| 17       | 10                          | 2         | 247.351                           | 245.736                         | 246.125                    | 248.07                     | 243.705                      | 250.429                     |
| 18       | 10                          | 2         | 247.209                           | 246.249                         | 246.127                    | 246.836                    | 245.284                      | 248.664                     |
| 19       | 20                          | 3         | 241.457                           | 237.454                         | 240.588                    | 245.128                    | 231.5                        | 247.874                     |
| 20       | 20                          | 3         | 242.773                           | 239.433                         | 242.29                     | 245.69                     | 234.549                      | 248.121                     |
| 21       | 20                          | 3         | 240.116                           | 235.907                         | 239.801                    | 244.07                     | 229.614                      | 246.821                     |
| 22       | 40                          | 8         | 227.251                           | 219.413                         | 227.482                    | 236.837                    | 206.934                      | 237.933                     |

|    |    |   |         |         |         |         |         |         |
|----|----|---|---------|---------|---------|---------|---------|---------|
| 23 | 40 | 8 | 226.406 | 218.295 | 226.936 | 236.557 | 205.316 | 237.265 |
| 24 | 40 | 8 | 226.213 | 218.288 | 227.038 | 236.08  | 205.625 | 236.868 |

**Table S3.** ImageJ analysis of nitrite detection zones after 5 minutes. Test order was randomized.

| Standard | Nitrite Concentration (ppm) | Run Order | Unweighted Intensity Value (a.u.) | Weighted Intensity Value (a.u.) | RGB Intensity Value (a.u.) | Red Intensity Value (a.u.) | Green Intensity Value (a.u.) | Blue Intensity Value (a.u.) |
|----------|-----------------------------|-----------|-----------------------------------|---------------------------------|----------------------------|----------------------------|------------------------------|-----------------------------|
| 1        | 0                           | 1         | 251.968                           | 251.992                         | 250.763                    | 249.775                    | 252.717                      | 253.685                     |
| 2        | 0                           | 1         | 251.915                           | 251.921                         | 251.017                    | 249.224                    | 252.844                      | 253.869                     |
| 3        | 0                           | 1         | 251.914                           | 251.922                         | 251.088                    | 249.225                    | 252.863                      | 253.824                     |
| 4        | 0.5                         | 4         | 250.573                           | 250.351                         | 249.432                    | 248.685                    | 250.736                      | 252.598                     |
| 5        | 0.5                         | 4         | 250.827                           | 250.421                         | 249.969                    | 248.271                    | 251                          | 253.222                     |
| 6        | 0.5                         | 4         | 250.833                           | 250.53                          | 249.698                    | 248.514                    | 251.057                      | 253.077                     |
| 7        | 1                           | 6         | 251.263                           | 250.69                          | 250.133                    | 250.075                    | 250.58                       | 253.265                     |
| 8        | 1                           | 6         | 250.23                            | 249.522                         | 249.352                    | 248.713                    | 249.393                      | 252.785                     |
| 9        | 1                           | 6         | 250.141                           | 249.434                         | 249.385                    | 248.292                    | 249.478                      | 252.789                     |
| 10       | 2.5                         | 7         | 244.944                           | 242.643                         | 244.496                    | 246.011                    | 239.397                      | 249.934                     |
| 11       | 2.5                         | 7         | 246.589                           | 244.712                         | 246.11                     | 247.005                    | 242.292                      | 250.884                     |
| 12       | 2.5                         | 7         | 245.889                           | 243.943                         | 245.226                    | 246.302                    | 241.452                      | 250.324                     |
| 13       | 5                           | 5         | 237.605                           | 231.712                         | 237.139                    | 242.977                    | 223.035                      | 246.796                     |
| 14       | 5                           | 5         | 237.572                           | 231.989                         | 237.177                    | 242.493                    | 223.784                      | 246.594                     |
| 15       | 5                           | 5         | 237.035                           | 231.612                         | 237.142                    | 241.717                    | 223.603                      | 246.021                     |
| 16       | 10                          | 2         | 223.378                           | 212.67                          | 223.991                    | 235.964                    | 195.814                      | 238.215                     |
| 17       | 10                          | 2         | 223.55                            | 212.965                         | 223.816                    | 235.84                     | 196.413                      | 238.282                     |
| 18       | 10                          | 2         | 225.718                           | 216.553                         | 226.289                    | 235.858                    | 202.565                      | 238.437                     |
| 19       | 20                          | 3         | 208.288                           | 191.069                         | 210.08                     | 232.827                    | 162.211                      | 230.008                     |
| 20       | 20                          | 3         | 207.778                           | 189.631                         | 210.133                    | 233.183                    | 159.454                      | 230.876                     |
| 21       | 20                          | 3         | 208.566                           | 190.976                         | 210.341                    | 232.842                    | 161.898                      | 231.138                     |
| 22       | 40                          | 8         | 199.566                           | 182.199                         | 202.669                    | 229.865                    | 150.953                      | 217.881                     |
| 23       | 40                          | 8         | 199.691                           | 181.343                         | 202.147                    | 230.718                    | 148.732                      | 219.557                     |
| 24       | 40                          | 8         | 196.835                           | 177.116                         | 199.941                    | 228.792                    | 142.568                      | 219.166                     |

**Table S4.** ImageJ analysis of nitrite detection zones after 1 hour. Test order was randomized.

| Standard | Nitrite Concentration (ppm) | Run Order | Unweighted Intensity Value (a.u.) | Weighted Intensity Value (a.u.) | RGB Intensity Value (a.u.) | Red Intensity Value (a.u.) | Green Intensity Value (a.u.) | Blue Intensity Value (a.u.) |
|----------|-----------------------------|-----------|-----------------------------------|---------------------------------|----------------------------|----------------------------|------------------------------|-----------------------------|
| 1        | 0                           | 1         | 250.839                           | 251.172                         | 249.499                    | 249.891                    | 251.894                      | 251.043                     |
| 2        | 0                           | 1         | 250.589                           | 250.904                         | 249.515                    | 249.458                    | 251.678                      | 250.958                     |
| 3        | 0                           | 1         | 249.964                           | 250.319                         | 248.89                     | 248.907                    | 251.084                      | 250.251                     |
| 4        | 0.5                         | 4         | 251.285                           | 251.279                         | 250.064                    | 250.566                    | 251.594                      | 251.894                     |
| 5        | 0.5                         | 4         | 249.559                           | 249.551                         | 248.777                    | 248.619                    | 249.947                      | 250.361                     |
| 6        | 0.5                         | 4         | 250.555                           | 250.619                         | 249.029                    | 249.666                    | 251.099                      | 251.178                     |
| 7        | 1                           | 6         | 250.137                           | 249.825                         | 248.439                    | 249.604                    | 249.772                      | 251.014                     |
| 8        | 1                           | 6         | 248.426                           | 248.114                         | 246.579                    | 247.851                    | 248.095                      | 249.341                     |
| 9        | 1                           | 6         | 249.126                           | 248.847                         | 248.082                    | 248.336                    | 248.915                      | 250.228                     |
| 10       | 2.5                         | 7         | 244.941                           | 243.052                         | 243.378                    | 246.964                    | 240.268                      | 247.431                     |
| 11       | 2.5                         | 7         | 247.549                           | 246.235                         | 246.605                    | 248.628                    | 244.486                      | 249.299                     |
| 12       | 2.5                         | 7         | 246.198                           | 244.804                         | 245.142                    | 248.282                    | 242.602                      | 247.49                      |
| 13       | 5                           | 5         | 251.626                           | 237.591                         | 240.418                    | 246.993                    | 231.026                      | 246.577                     |
| 14       | 5                           | 5         | 241.667                           | 238.154                         | 239.708                    | 246.463                    | 232.346                      | 245.961                     |
| 15       | 5                           | 5         | 240.273                           | 236.707                         | 239.698                    | 245.062                    | 230.868                      | 244.626                     |
| 16       | 10                          | 2         | 228.775                           | 221.865                         | 228.932                    | 239.326                    | 210.077                      | 236.632                     |
| 17       | 10                          | 2         | 228.699                           | 221.705                         | 228.175                    | 239.476                    | 209.75                       | 236.551                     |
| 18       | 10                          | 2         | 231.959                           | 226.094                         | 231.647                    | 241.007                    | 215.879                      | 239.018                     |
| 19       | 20                          | 3         | 215.88                            | 204.922                         | 216.451                    | 235.059                    | 185.15                       | 227.573                     |



|    |    |   |         |         |         |         |         |         |
|----|----|---|---------|---------|---------|---------|---------|---------|
| 20 | 20 | 3 | 213.68  | 202.513 | 214.403 | 233.036 | 182.436 | 225.753 |
| 21 | 20 | 3 | 214.992 | 204.514 | 215.893 | 233.238 | 185.695 | 226.038 |
| 22 | 40 | 8 | 209.424 | 198.099 | 210.888 | 232.793 | 176.237 | 219.352 |
| 23 | 40 | 8 | 208.019 | 195.834 | 209.695 | 232.543 | 172.57  | 219.095 |
| 24 | 40 | 8 | 206.98  | 194.586 | 208.561 | 231.346 | 171.189 | 218.475 |

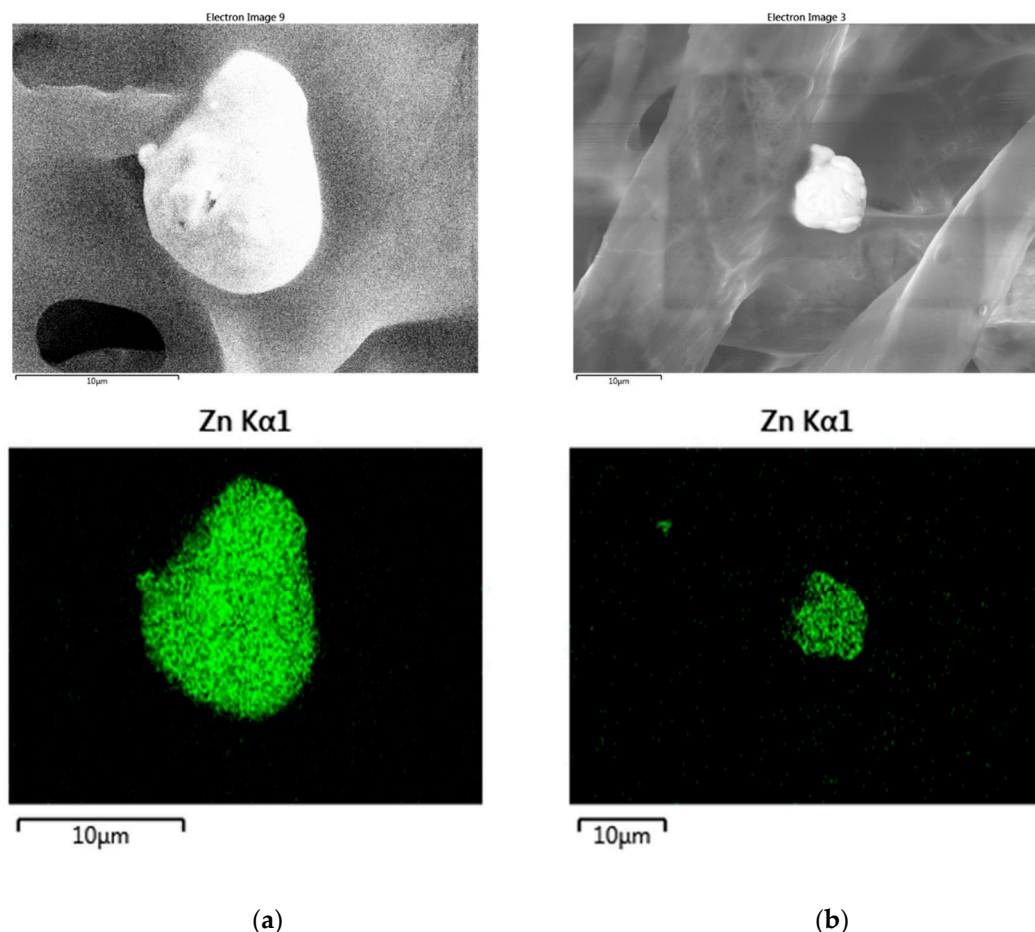

**Figure S5.** Zinc microparticles observed using an electron scanning microscope with EDS analysis in the nitrate test fields of commercial dip strips (a) Quantofix 91313 (b) Quantofix 91351.

## Reference

1. Thongkam, T., & Hemavibool, K. An environmentally friendly microfluidic paper-based analytical device for simultaneous colorimetric detection of nitrite and nitrate in food products. *Microchem. J.* **2020**, 159, doi: 10.1016/j.microc.2020.105412
